# Supplementary material
Source: HighWire-hosted journal article supplement (https://erj.ersjournals.com/content/55/5/1902151)
Supplement: inline-supplementary-material-1 [file inline-supplementary-material-1.pdf]

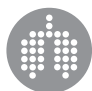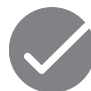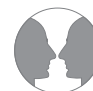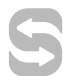

SHAREABLE PDF

# FVC variability in patients with idiopathic pulmonary fibrosis and role of 6-min walk test to predict further change

Steven D. Nathan<sup>1</sup>, Ming Yang<sup>2</sup>, Elizabeth A. Morgenthien <sup>2</sup> and John L. Stauffer<sup>2</sup>

**Affiliations:** <sup>1</sup>Inova Fairfax Hospital, Falls Church, VA, USA. <sup>2</sup>Genentech, Inc., South San Francisco, CA, USA.

**Correspondence:** Steven D. Nathan, Advanced Lung Disease and Transplant Program, Inova Fairfax Hospital, 3300 Gallows Rd, Falls Church, VA 22042, USA. E-mail: Steven.Nathan@inova.org

 @ERSpublications

Variability in 3-month changes in FVC was examined in 954 patients with IPF (n=3966 observations) from phase 3 trials; concurrent 3-month decline in the FVC and 6MWD (n=1321 observations) predicted further decline in FVC over the subsequent 3 months <http://bit.ly/2GfBKW3>

**Cite this article as:** Nathan SD, Yang M, Morgenthien EA, *et al.* FVC variability in patients with idiopathic pulmonary fibrosis and role of 6-min walk test to predict further change. *Eur Respir J* 2020; 55: 1902151 [<https://doi.org/10.1183/13993003.02151-2019>].

This single-page version can be shared freely online.

## To the Editor:

Disease progression in idiopathic pulmonary fibrosis (IPF) is monitored by decline in forced vital capacity (FVC) [1]. An absolute or relative decline in % predicted FVC  $\geq 10\%$  is associated with mortality [2, 3]. Measures of FVC decline were selected as primary endpoints in the pivotal phase 3 trials of antifibrotic therapies [4–6]. Despite consistent trends for FVC decline in the IPF population, the rate of disease progression in individuals is unpredictable and highly variable: significant variability in FVC is observed over time, and prior declines are a poor predictor of future FVC decline [1, 7, 8]. In new trials in IPF, the margin for reducing FVC decline is smaller ( $\sim 70$  mL) in patients who are receiving an investigational drug with background antifibrotics than in the placebo arms of past trials (130–210 mL) [9].
